# Supplementary material for: The effects and costs of home-based rehabilitation for heart failure with reduced ejection fraction: The REACH-HF multicentre randomized controlled trial
Source: PubMed Central journal article supplement — Eur J Prev Cardiol. 2018 Oct 10;26(3):262–72. doi: 10.1177/2047487318806358 (PMC6376602; doi:10.1177/2047487318806358), 2018-10-10

**Table S1** Interactions on primary outcome at 12 months

| Covariate                             | REACH-HF vs usual care:<br>mean difference (95% CI)*† | Global p value |
|---------------------------------------|-------------------------------------------------------|----------------|
| Location                              |                                                       |                |
| (reference: Cornwall)                 |                                                       |                |
| Gwent                                 | -0.1 (-14.1 to 13.9)                                  |                |
| Birmingham                            | -9.8 (-23.5 to 3.8)                                   | 0.468          |
| York                                  | -1.3 (-14.6 to 12.0)                                  |                |
| NT-pro-BNP levels                     |                                                       |                |
| (reference: low [ $\leq 2000$ pg/ml]) |                                                       |                |
| High (>2000 pg/ml)                    | 8.4 (-3.8 to 20.5)                                    | 0.175          |
| Caregiver present (reference: no)     |                                                       |                |
| Yes                                   | -2.7 (-12.9 to 7.5)                                   | 0.599          |
| Time since diagnosis of HF (years)    |                                                       |                |
| (reference: <1)                       |                                                       |                |
| 1-2                                   | 7.1 (-7.2 to 21.4)                                    | 0.089          |
| >2                                    | -7.4 (-18.4 to 3.5)                                   |                |

CI = confidence interval; HF = heart failure; NT-pro-BNP = N terminal proB type natriuretic peptide; REACH-HF = Rehabilitation EnAblement in CHronic Heart Failure.

\*All analyses adjust for baseline values, site, NT-pro-BNP ( $\leq 2000$  or  $>2000$  pg/ml), past myocardial infarction, and diagnosis of atrial fibrillation or atrial flutter.

†All analyses are intention to treat.

**Table S2.** REACH-HF intervention contacts and costs (n=94)

| Contacts/item                                                                                      | Contacts (n)        | Duration (mins)                  |                           |
|----------------------------------------------------------------------------------------------------|---------------------|----------------------------------|---------------------------|
|                                                                                                    |                     | Contact                          | Non-contact<br>(planning) |
| <b>Contacts</b>                                                                                    |                     |                                  |                           |
| Face-to-face contacts                                                                              | 3.96 (1.2) [2, 7]   | 69.15 (28.4) [8, 170]            | 35.96 (34.1) [5, 200]     |
| Telephone contacts                                                                                 | 2.51 (2.37) [0, 9]  | 18.89 (9.06) [2, 50]             | 13.68 (12.8) [0, 100]     |
| Total contacts                                                                                     | 6.52 (2.63) [3, 13] |                                  |                           |
| <b>Total time</b>                                                                                  |                     |                                  |                           |
| Face-to-face contacts                                                                              |                     | 271.45 (93.6)                    |                           |
| Telephone contacts                                                                                 |                     | 47.41 (49.6)                     |                           |
| <b>Total planning and non-contact time</b>                                                         |                     |                                  |                           |
| Face-to-face                                                                                       |                     | 141.91 (89.9)                    |                           |
| Telephone                                                                                          |                     | 34.35 (42.2)                     |                           |
| Overall total time input<br>(excluding travel time, as allowance<br>already in unit cost estimate) |                     | 495.13 (180) [175,<br>1190]      |                           |
| <b>Costs (£/\$)</b>                                                                                |                     |                                  |                           |
| Cost per hour* (33)                                                                                |                     | 44.00/61.97                      |                           |
| Estimated total delivery cost (HF<br>facilitator)*                                                 |                     | 362.93/509.90<br>(131.96/185.86) |                           |
| <b>Other resource use and costs†</b>                                                               |                     |                                  |                           |
| Consumables (1 REACH-HF<br>Manual)                                                                 |                     | 25.00/35.21                      |                           |
| DVDs (2 at £7.50/\$10.56 each)                                                                     |                     | 15.00/21.13                      |                           |

|                                                                 |                                                     |
|-----------------------------------------------------------------|-----------------------------------------------------|
| Distribution of HF facilitator training costs, per participant† | 15.47/21.79                                         |
| Estimated total delivery cost for REACH-HF Manual‡              | 418.39/589.28<br>(207.14/291.75 to 733.28/1,032.79) |

CI = confidence interval; HF = heart failure; REACH-HF = Rehabilitation EnAblement in CHronic Heart Failure; SD = standard deviation.

\*Staff unit costs: grade equivalent to 'community nurse', based on United Kingdom's Agenda for Change band 6, estimated cost per hour (33), includes salary, salary on-costs, overheads (management costs and non-staff costs (including travel and transport)) and capital overheads and excludes costs for qualifications.

†Other cost components: training cost per REACH-HF facilitator specific to delivery of the REACH-HF intervention are estimated at £1547 (see web appendix for further detail), these costs are distributed across the first 100 participants and patients receiving the intervention at £15.47 per participant.

‡When simulating uncertainty in the major cost component of time input for HF facilitator (mean time 495.13 (SD 180) mins) and holding other costs constant (£58.97 per patient) over 1000 simulations provides an estimated overall cost per patient or participant of £438.57 (median £413.57, 95% CI £207.14 to £733.28).

**Figure S1** Components of the Rehabilitation EnAblement in CHronic Heart Failure (REACH-HF) intervention.

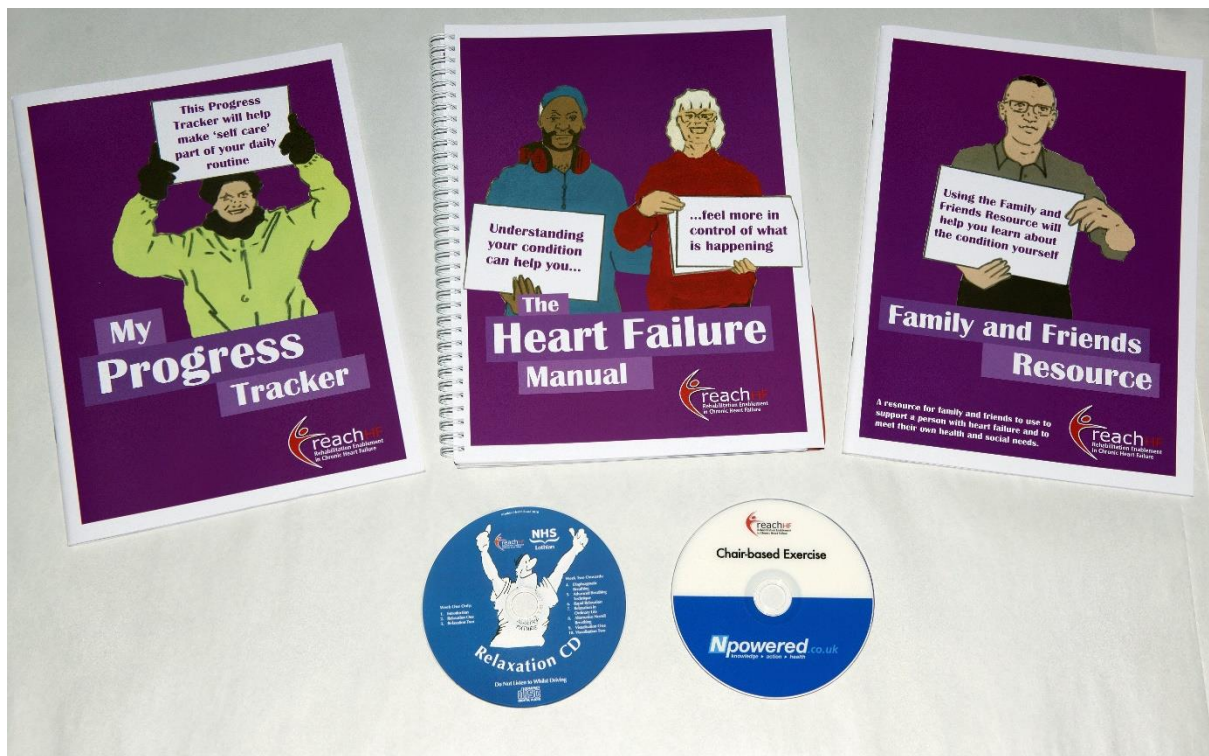

Supplement: Supplemental_material.pdf [file Supplemental_material.pdf]
